# Supplementary material
Source: publisher figshare collection journal article supplement (https://acs.figshare.com/ndownloader/files/4451938)
Supplement: Supplementary file 1 [file 4451938]

## Supporting Information

The uncoated and four different formulations of 5 BL-coated fabrics were submitted to the same vertical flame test used for 20 BL samples in Figure 7. The images below, taken after burning, show the remains of the fabrics. Nothing was left of the uncoated fabric, but there is a significant amount of residue left from the coated fabrics. More layers result in more residue, as shown in Figure 7.

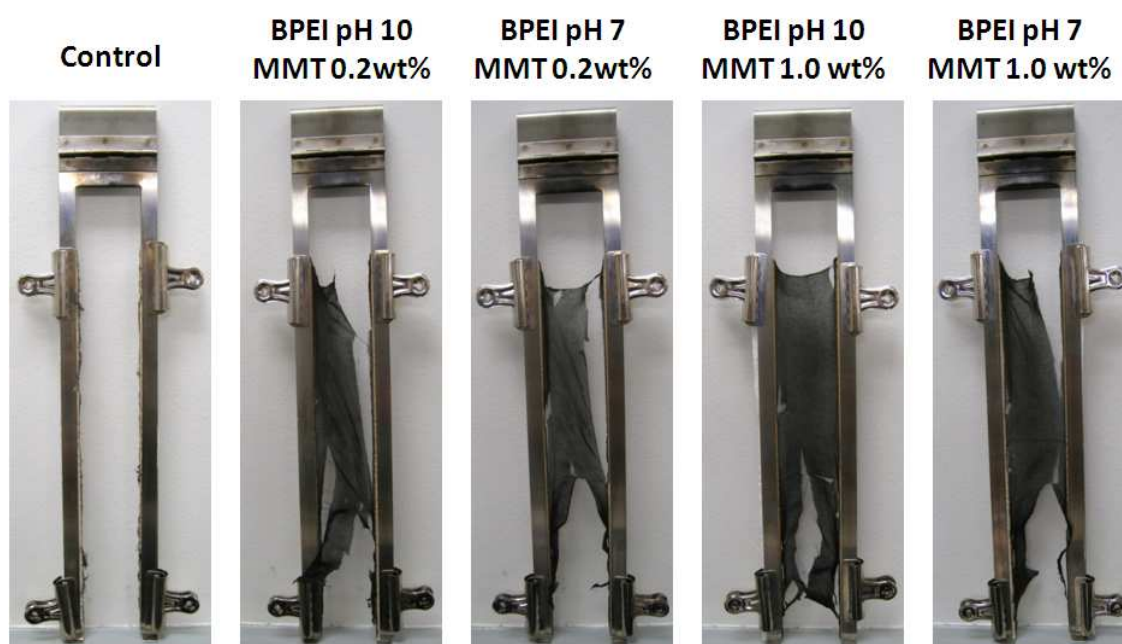

**Figure S1.** The post-burn images of uncoated and 4 recipes of 5 BL coated fabrics with sample holders.

**Table S1. Fabric counts of uncoated and coated fabrics.**

| Sample              | BL number | Warp | Fill |
|---------------------|-----------|------|------|
| Control             |           | 79   | 78   |
| BPEI pH10/0.2% MMT  | 5         | 78   | 79   |
|                     | 20        | 81   | 81   |
| BPEI pH 7 /0.2% MMT | 5         | 78   | 78   |
|                     | 20        | 80   | 82   |
| BPEI pH10/ 1 % MMT  | 5         | 80   | 78   |
|                     | 20        | 78   | 79   |
| BPEI pH 7/ 1 % MMT  | 5         | 79   | 79   |
|                     | 20        | 77   | 79   |

**Table S2. Vertical wicking rate of fabrics.**

| Sample              | BL number | Wicking Rate (mm/s) |      |
|---------------------|-----------|---------------------|------|
|                     |           | Warp                | Fill |
| Control             |           | 2.50                | 2.61 |
| BPEI pH10/0.2% MMT  | 5         | 1.25                | 0.91 |
|                     | 20        | 1.22                | 1.00 |
| BPEI pH 7 /0.2% MMT | 5         | 0.72                | 0.48 |
|                     | 20        | 0.82                | 0.67 |
| BPEI pH10/ 1 % MMT  | 5         | 2.00                | 0.79 |
|                     | 20        | 1.22                | 0.97 |
| BPEI pH 7/ 1 % MMT  | 5         | 0.81                | 0.44 |
|                     | 20        | 0.86                | 0.61 |
